# Supplementary material for: Application of modular response analysis to medium- to large-size biological systems
Source: PubMed Central journal article supplement (PMC9060349; doi:10.1371/journal.pcbi.1009312), 2022-04-20
Supplement: pcbi.1009312.s006.pdf [file pcbi.1009312.s006.pdf]

Dear Editors,  
Dear Reviewers,

Thank you for evaluating our manuscript and for your comments that enabled us to improve our work. Please find hereafter our detailed answers.

During the time of the review, we have found a better implementation of ARACNE that yielded performance worth discussing in the revised manuscript. It has been added in every comparison, figure, and supplementary information accordingly. We also added tests on synthetic data. With two additional figures, we decided to remove the previous figures presenting t-SNE plots of the data sets, which did not play any important role in our study.

Yours faithfully,  
Jacques Colinge on behalf of all the authors

Reviewer #1:

The authors have developed a new Modular response analysis method for biological perturbation analysis. The applications to medium and large systems show superior performances to other methods when compared to PPI. The algorithm could also parallel in multi-cores. The paper is well written and easy to follow.

[We thank the reviewer for this global positive feedback](#)

Major:

1. In the case study, the authors only claim a difference between tumor and normal cells. The simple difference isn't enough because many methods can produce a difference while the difference isn't not necessarily meaningful in biology. This is also a critical point to justify the method.

[Thank you for raising this important point. First, we would like to stress that our manuscript is purely methodological and the data sets were selected because they provided systematic perturbations as required by MRA. We provided one example for each data set to illustrate the potential interest of a network biology approach, but our purpose was not to pretend that biologically meaningful conclusions can be derived from these data sets. We simply propose a novel and competitive method to infer biological networks, whose importance in biological research is well-known independent of the two particular data sets exploited in the study to estimate performance solely. The value of the proposed method is justified by comparison with reference data sets of molecular interactions and related, broadly used methods.](#)

[Regarding the L1000/CMAP data set, which is the one where we compared a "normal" network to a "metastatic melanoma" network, the particular design of L1000 renders the suggested analysis difficult. Indeed, L1000 profiles the expression of ~1000 landmark genes chosen for their ability to recapitulate whole transcriptomes of the CCLE cancer cell lines. Using the DAVID web server, enrichment analysis of diseases associated with the genes present in the normal HA1E data set returns multiple cancers at the top of the list \(GAD database, see below\). Accordingly, we did not find obvious cancer signatures in cancer cell lines that would be absent in the \(immortalized\) normal cell line HA1E with such cancer-biased genes. To return to whole transcriptomes is not possible since MRA requires systematic, individual perturbations of all the genes, what is only available for L1000 hallmark genes.](#)

## Functional Annotation Chart

[Help and Manual](#)

Current Gene List: genes-HA1E  
 Current Background: Homo sapiens  
 937 DAVID IDs  
 Options

[Rerun Using Options](#) [Create Sublist](#)

332 chart records

| Sublist                  | Category    | Term                                                                                                                                               | RT | Genes | Count | %    | P-Value | Benjamini |
|--------------------------|-------------|----------------------------------------------------------------------------------------------------------------------------------------------------|----|-------|-------|------|---------|-----------|
| <input type="checkbox"/> | GAD_DISEASE | Breast Cancer                                                                                                                                      | RT |       | 94    | 10.0 | 2.0E-20 | 8.2E-17   |
| <input type="checkbox"/> | GAD_DISEASE | breast cancer                                                                                                                                      | RT |       | 85    | 9.1  | 1.1E-19 | 1.8E-16   |
| <input type="checkbox"/> | GAD_DISEASE | Lung Cancer                                                                                                                                        | RT |       | 92    | 9.8  | 1.3E-19 | 1.8E-16   |
| <input type="checkbox"/> | GAD_DISEASE | Bladder Cancer                                                                                                                                     | RT |       | 85    | 9.1  | 4.4E-19 | 4.5E-16   |
| <input type="checkbox"/> | GAD_DISEASE | lung cancer                                                                                                                                        | RT |       | 82    | 8.8  | 4.0E-18 | 3.3E-15   |
| <input type="checkbox"/> | GAD_DISEASE | esophageal adenocarcinoma                                                                                                                          | RT |       | 65    | 6.9  | 9.0E-18 | 6.1E-15   |
| <input type="checkbox"/> | GAD_DISEASE | chronic obstructive pulmonary disease                                                                                                              | RT |       | 67    | 7.2  | 3.9E-15 | 2.3E-12   |
| <input type="checkbox"/> | GAD_DISEASE | ovarian cancer                                                                                                                                     | RT |       | 62    | 6.6  | 9.4E-15 | 4.8E-12   |
| <input type="checkbox"/> | GAD_DISEASE | plasma HDL cholesterol (HDL-C) levels                                                                                                              | RT |       | 49    | 5.2  | 1.8E-14 | 7.5E-12   |
| <input type="checkbox"/> | GAD_DISEASE | Type 2 Diabetes  edema   rosiglitazone                                                                                                             | RT |       | 202   | 21.6 | 1.8E-14 | 7.5E-12   |
| <input type="checkbox"/> | GAD_DISEASE | Chronic renal failure Kidney Failure, Chronic                                                                                                      | RT |       | 108   | 11.5 | 2.1E-14 | 7.8E-12   |
| <input type="checkbox"/> | GAD_DISEASE | Colorectal Cancer                                                                                                                                  | RT |       | 64    | 6.8  | 5.7E-13 | 1.9E-10   |
| <input type="checkbox"/> | GAD_DISEASE | Lymphoma, Non-Hodgkin                                                                                                                              | RT |       | 43    | 4.6  | 7.5E-11 | 2.4E-8    |
| <input type="checkbox"/> | GAD_DISEASE | Alzheimer's disease                                                                                                                                | RT |       | 101   | 10.8 | 1.8E-10 | 4.9E-8    |
| <input type="checkbox"/> | GAD_DISEASE | Multiple Sclerosis                                                                                                                                 | RT |       | 72    | 7.7  | 1.8E-10 | 4.9E-8    |
| <input type="checkbox"/> | GAD_DISEASE | epithelial ovarian cancer                                                                                                                          | RT |       | 34    | 3.6  | 2.0E-10 | 5.0E-8    |
| <input type="checkbox"/> | GAD_DISEASE | ovarian cancer                                                                                                                                     | RT |       | 31    | 3.3  | 2.6E-10 | 6.3E-8    |
| <input type="checkbox"/> | GAD_DISEASE | Colorectal Neoplasms                                                                                                                               | RT |       | 24    | 2.6  | 7.0E-9  | 1.6E-6    |
| <input type="checkbox"/> | GAD_DISEASE | null                                                                                                                                               | RT |       | 94    | 10.0 | 1.6E-8  | 3.4E-6    |
| <input type="checkbox"/> | GAD_DISEASE | Leukemia, Lymphocytic, Chronic, B-Cell                                                                                                             | RT |       | 35    | 3.7  | 1.9E-8  | 3.8E-6    |
| <input type="checkbox"/> | GAD_DISEASE | HIV                                                                                                                                                | RT |       | 34    | 3.6  | 3.9E-8  | 7.6E-6    |
| <input type="checkbox"/> | GAD_DISEASE | Bone Mineral Density                                                                                                                               | RT |       | 51    | 5.4  | 1.2E-7  | 2.2E-5    |
| <input type="checkbox"/> | GAD_DISEASE | longevity                                                                                                                                          | RT |       | 52    | 5.5  | 1.4E-7  | 2.4E-5    |
| <input type="checkbox"/> | GAD_DISEASE | Arthritis, Rheumatoid                                                                                                                              | RT |       | 26    | 2.8  | 1.5E-7  | 2.6E-5    |
| <input type="checkbox"/> | GAD_DISEASE | atherosclerosis                                                                                                                                    | RT |       | 44    | 4.7  | 1.0E-6  | 1.7E-4    |
| <input type="checkbox"/> | GAD_DISEASE | diabetes, type 2                                                                                                                                   | RT |       | 50    | 5.3  | 2.1E-6  | 3.2E-4    |
| <input type="checkbox"/> | GAD_DISEASE | Head and Neck Neoplasms Neoplasm Recurrence, Local Neoplasms, Second Primary                                                                       | RT |       | 24    | 2.6  | 2.1E-6  | 3.2E-4    |
| <input type="checkbox"/> | GAD_DISEASE | Alzheimer's Disease                                                                                                                                | RT |       | 41    | 4.4  | 3.0E-6  | 4.4E-4    |
| <input type="checkbox"/> | GAD_DISEASE | Precursor Cell Lymphoblastic Leukemia-Lymphoma                                                                                                     | RT |       | 21    | 2.2  | 3.4E-6  | 4.8E-4    |
| <input type="checkbox"/> | GAD_DISEASE | stomach cancer                                                                                                                                     | RT |       | 19    | 2.0  | 4.5E-6  | 6.1E-4    |
| <input type="checkbox"/> | GAD_DISEASE | Brain Neoplasms Glioma meningioma Neuroma, Acoustic Neuromas, Acoustic                                                                             | RT |       | 7     | 0.7  | 4.9E-6  | 6.4E-4    |
| <input type="checkbox"/> | GAD_DISEASE | Inflammation Premature Birth                                                                                                                       | RT |       | 22    | 2.3  | 6.8E-6  | 8.3E-4    |
| <input type="checkbox"/> | GAD_DISEASE | Connective Tissue Diseases Fetal Diseases Inflammation Musculoskeletal Diseases Pregnancy Complications, Hematologic Premature Birth Skin Diseases | RT |       | 22    | 2.3  | 6.8E-6  | 8.3E-4    |
| <input type="checkbox"/> | GAD_DISEASE | Esophageal Cancer                                                                                                                                  | RT |       | 14    | 1.5  | 1.0E-5  | 1.2E-3    |
| <input type="checkbox"/> | GAD_DISEASE | Stomach Neoplasms                                                                                                                                  | RT |       | 20    | 2.1  | 1.3E-5  | 1.5E-3    |
| <input type="checkbox"/> | GAD_DISEASE | prostate cancer                                                                                                                                    | RT |       | 52    | 5.5  | 2.8E-5  | 3.2E-3    |
| <input type="checkbox"/> | GAD_DISEASE | Mouth Neoplasms Precancerous Conditions                                                                                                            | RT |       | 8     | 0.9  | 2.9E-5  | 3.2E-3    |
| <input type="checkbox"/> | GAD_DISEASE | head and neck cancer                                                                                                                               | RT |       | 17    | 1.8  | 3.5E-5  | 3.7E-3    |
| <input type="checkbox"/> | GAD_DISEASE | metabolic syndrome                                                                                                                                 | RT |       | 24    | 2.6  | 3.9E-5  | 3.9E-3    |
| <input type="checkbox"/> | GAD_DISEASE | Brain Neoplasms Glioblastoma                                                                                                                       | RT |       | 9     | 1.0  | 3.9E-5  | 3.9E-3    |
| <input type="checkbox"/> | GAD_DISEASE | Albuminuria Inflammation Kidney Diseases                                                                                                           | RT |       | 9     | 1.0  | 3.9E-5  | 3.9E-3    |
| <input type="checkbox"/> | GAD_DISEASE | Hodgkin Disease Leukemia, Lymphocytic, Chronic, B-Cell Lymphoproliferative Disorders Waldenström Macroglobulinemia                                 | RT |       | 21    | 2.2  | 4.1E-5  | 4.0E-3    |
| <input type="checkbox"/> | GAD_DISEASE | Carcinoma, Squamous Cell Mouth Neoplasms Neoplasm Metastasis Squamous cell carcinoma                                                               | RT |       | 5     | 0.5  | 4.5E-5  | 4.2E-3    |
| <input type="checkbox"/> | GAD_DISEASE | Type 2 diabetes                                                                                                                                    | RT |       | 40    | 4.3  | 4.5E-5  | 4.2E-3    |
| <input type="checkbox"/> | GAD_DISEASE | overall effect                                                                                                                                     | RT |       | 8     | 0.9  | 6.4E-5  | 5.6E-3    |
| <input type="checkbox"/> | GAD_DISEASE | pancreatic neoplasm Pancreatic Neoplasms                                                                                                           | RT |       | 8     | 0.9  | 6.4E-5  | 5.6E-3    |
| <input type="checkbox"/> | GAD_DISEASE | myeloid leukemia                                                                                                                                   | RT |       | 9     | 1.0  | 7.3E-5  | 6.3E-3    |

2. The method was evaluated with different proportions of predicted interactions. While the higher accuracy is valuable, it's required to describe the evaluate the obtained values like p-values. Such values can provide a guide threshold for users to use the results.

We certainly agree, but there are different factors to consider. First of all, the different algorithms we compared do not estimate the confidence of individual inferred interactions. For this reason and to homogenize the comparisons, we decided to take the top 5%, 10%, 20%, etc. scored interactions of each algorithm and compare to a reference database. These comparisons yield confusion matrices in every case, for which we computed a P-value reflecting the overall quality of the inference at a top x% level for each algorithm. All the confusion matrices were provided. The revised text insists on this point to make sure it is clear for the reader thanks to this remark. (We also provide additional indicators sur as specificity, precision, etc.)

Second, to better address this important point, we have introduced synthetic networks as an initial estimate of performance. Indeed, there is a standard difficulty dealing with experimental data, which is that the reference network is not known accurately and completely. Moreover, such networks depend on the very genome of the cells used (especially in the L1000/CMAP data set with distinct cancer cell lines), and their culture conditions (especially the medium size kinase data set). Reference public interaction databases aggregate observations made in a few convenient cell lines such as HEK293, etc. This was the reason to use STRING due to its ability to

be more "comprehensive" than other resources. Nevertheless, missing and false positive interactions in STRING renders the estimation of accurate TP, FP, TN, and FN interactions impossible. Only approximations can be obtained. We believe that this is not an issue since all the methods are compared with the same procedure (as many other authors do in identical conditions).

We believe that the complement provided by performance estimates on synthetic networks combined by the summary figures and all the confusion matrices (with P-values, precision, etc.) should be sufficient to support our claims and let readers make their opinion.

3. It's beneficial to show the actual running time and make comparison with other methods.

We have added a table and discussed this information.

Reviewer #2:

This paper proposed to use MRA to infer the protein interaction network using the data obtained through the 33 systematic perturbation of the actors. While the topic is interesting, I have a few concerns as listed below.

1. In fig 1, the green cluster seems to corresponding to FGF1, instead of WNT3A?

The text indeed contained a few mistakes referring to these colors; we apologize for this. This part has been removed from the revised version since it was not really useful and we introduced two new figures.

2. For the data there are 61 genes and 11 conditions. In my understanding, there should be 11 networks estimated. Or have you inferred the networks for None-, WNT3A- and IFNg-stimulated data separately?

We inferred separate networks for each condition, *i.e.*, 11 networks. Those inferences were done independently since we do not know how much is shared (kinase signaling might be pretty flexible) and, anyway, we only propose an algorithm to infer one network from one dataset. We do have a notion of increased confidence on shared features between parallel inferred networks that might have similarities. This would be a nice feature but it is out of our scope. We are sorry if the text was not completely clear; we have revised it to better insist on this important detail.

3. For STRING database, some of their interactions are predicted with a confidence score. Did you use any threshold in the STRING network? If so, how did you select the threshold?

This is an important point, which we have addressed. In the revised manuscript, all the comparisons against STRING that are reported in the figures, correspond to STRING interactions with STRING score > 0.5, a reasonable compromise between stringency and sensitivity of the reference network. In the supplementary tables, we report all the confusion matrices against STRING with scores > 0.8, 0.5, and 0. This does not change the relative merit of each algorithm and is now mentioned in the revised text.

4. For the performance evaluation, it is better to include other metrics like specificity, sensitivity, AUC and accuracy as well. Without these information, it is hard for me to evaluate the quality of this work properly.

We agree and the tables in the figures have been modified to include specificity, accuracy and precision. All the supplementary tables have been updated as well, they contain in addition recall and P-values.

**Have the authors made all data and (if applicable) computational code underlying the findings in their manuscript fully available?**

Reviewer #1: None

We made the code available with one example data set (ACTA condition from K61 data set). We have now added the 50TFx50TA synthetic data example.

Reviewer #2: Yes
